# Supplementary material for: Melanocortin-4 Receptor Antagonism Inhibits Colorectal and Anaplastic Thyroid Cancer In Vitro and In Vivo
Source: MDPI journal article supplement (doi:10.3390/jcm14041165), 2025-02-11
Supplement: s1 [file jcm-3403040-supplementary.pdf › jcm-3403040-supplementary.pdf]

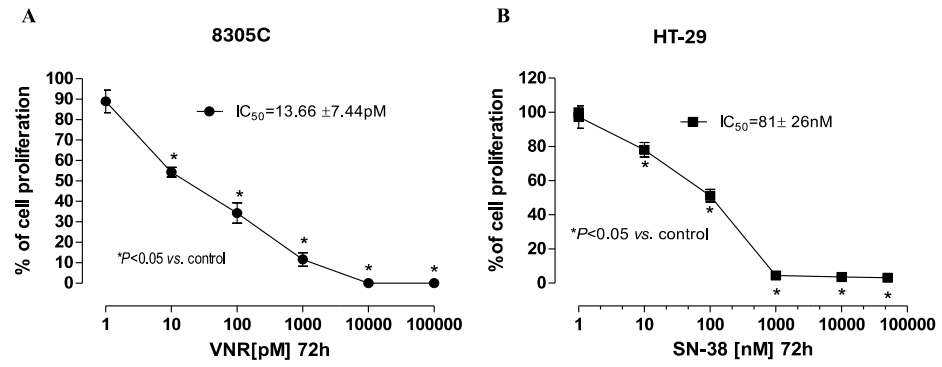

**Figure S1.** A: Antiproliferative effect of vinorelbine *in vitro* on human 8305C ATC cell lines. The antiproliferative effects of the drug were studied after 72 h of exposure. The data are presented as mean ( $\pm$ SEM) percentage values of vehicle-treated cell proliferation. \* P < 0.05 vs. controls. Figure S1B: Antiproliferative effect of SN-38 *in vitro* on human HT-29 colon rectal cell lines. The antiproliferative effects of the drug were studied after 72 h of exposure. The data are presented as mean ( $\pm$ SEM) percentage values of vehicle-treated cell proliferation. \* P < 0.05 vs. controls.
